# Supplementary material for: Collateral Circulation and Outcome in Atherosclerotic Versus Cardioembolic Cerebral Large Vessel Occlusion
Source: PubMed Central journal article supplement — Stroke. 2019 Oct 29;50(12):3360–8. doi: 10.1161/STROKEAHA.119.026299 (PMC7597992; doi:10.1161/strokeaha.119.026299), 2019-10-29
Supplement: str-50-3360-s001.pdf [file str-50-3360-s001.pdf]

SUPPLEMENTAL MATERIAL

Supplemental Tables

**Supplemental Table I.** Causes of cardioembolic stroke<sup>a</sup>

|                                                                 | Total (N = 476) – n. (%) |
|-----------------------------------------------------------------|--------------------------|
| <b>High-risk source</b>                                         |                          |
| Past medical history of atrial fibrillation                     | 251 (53)                 |
| Newly diagnosed atrial fibrillation                             | 111 (23)                 |
| Mechanical prosthetic valve                                     | 18 (4)                   |
| Myocardial infarction <4 weeks before ischemic stroke           | 9 (2)                    |
| Infective endocarditis                                          | 7 (1)                    |
| Sick sinus syndrome                                             | 5 (1)                    |
| Left ventricular thrombus                                       | 4 (1)                    |
| Akinetic left ventricle segment                                 | 4 (1)                    |
| <b>Medium-risk source</b>                                       |                          |
| Other cardiomyopathy                                            | 13 (3)                   |
| Atrial flutter                                                  | 9 (2)                    |
| Bioprosthetic valve                                             | 3 (2)                    |
| Patent foramen ovale                                            | 3 (1)                    |
| Myocardial infarction >4 weeks <6 months before ischemic stroke | 3 (1)                    |
| Other <sup>b</sup>                                              | 8 (2)                    |

<sup>a</sup>Patients may have more than one reported cardiac source of stroke.

<sup>b</sup>Other: Left ventricle fibrillation, mitral valve prolapse, atrial septum defect, heart failure.

**Supplemental Table II.** Baseline characteristics of large vessel occlusion stroke patients with moderate (51-70%) and severe (71-99%) stenosis of the ipsilateral cervical carotid artery measured according to NASCET method

|                                               | Cervical carotid stenosis (N = 82) <sup>a</sup> |                             | P-value |
|-----------------------------------------------|-------------------------------------------------|-----------------------------|---------|
|                                               | 51-70% stenosis<br>(n = 36)                     | 71-99% stenosis<br>(n = 46) |         |
| Median age, years (IQR)                       | 69 (63-81)                                      | 71 (63-76)                  | 0.73    |
| Men, n (%)                                    | 16/36 (44)                                      | 32/46 (70)                  | 0.02    |
| Medical history                               |                                                 |                             |         |
| Diabetes mellitus, n/N (%)                    | 5/35 (14)                                       | 5/46 (11)                   | 0.64    |
| Hypertension, n/N (%)                         | 15/34 (44)                                      | 18/46 (39)                  | 0.65    |
| Ischemic stroke, n/N (%)                      | 8/35 (23)                                       | 6/46 (13)                   | 0.25    |
| Medication                                    |                                                 |                             |         |
| DOAC, n/N (%)                                 | 0/36 (0)                                        | 0/45 (0)                    | n/a     |
| Vitamin K antagonist, n/N (%)                 | 1/36 (3)                                        | 1/46 (2)                    | 1.00    |
| Antiplatelets, n/N (%)                        | 10/35 (29)                                      | 15/46 (33)                  | 0.70    |
| IV rtPA prior to EVT, n (%)                   | 32/36 (89)                                      | 40/46 (87)                  | 0.79    |
| Pre-stroke mRS, n/N (%)                       |                                                 |                             | 0.68    |
| 0                                             | 23/34 (68)                                      | 35/46 (76)                  |         |
| 1                                             | 6/34 (18)                                       | 8/46 (17)                   |         |
| 2                                             | 2/34 (6)                                        | 2/46 (4)                    |         |
| ≥3                                            | 3/34 (9)                                        | 1/46 (2)                    |         |
| Clinical characteristics                      |                                                 |                             |         |
| Median baseline NIHSS (IQR) <sup>b</sup>      | 15 (13-23)                                      | 16 (11-20)                  | 0.88    |
| Median systolic blood pressure in mmHg (IQR)  | 152 (139-166)                                   | 159 (148-170)               | 0.20    |
| Median diastolic blood pressure in mmHg (IQR) | 80 (72-90)                                      | 84 (72-94)                  | 0.39    |
| Median onset-to-groin in minutes (IQR)        | 223 (172-270)                                   | 196 (144-248)               | 0.09    |
| Laboratory investigations                     |                                                 |                             |         |
| Median serum glucose (IQR) <sup>c</sup>       | 7.0 (6.3-8.3)                                   | 6.5 (5.7-7.7)               | 0.10    |
| Median platelet count (IQR) <sup>d</sup>      | 253 (199-315)                                   | 244 (200-277)               | 0.37    |

|                                                   |                 |                  |      |
|---------------------------------------------------|-----------------|------------------|------|
| Median INR (IQR) <sup>e</sup>                     | 1.0 (1.0-1.1)   | 1.0 (1.0-1.1)    | 0.73 |
| Imaging characteristics                           |                 |                  |      |
| Median ASPECTS (IQR) <sup>f</sup>                 | 9 (7-9)         | 8 (7-10)         | 0.92 |
| Occlusion location on CT-angiography,<br>n/N (%)  |                 |                  | 0.82 |
| ICA                                               | 3/36 (8)        | 2/46 (4)         |      |
| ICA-T                                             | 8/36 (22)       | 11/46 (24)       |      |
| Proximal M1                                       | 10/36 (28)      | 17/46 (37)       |      |
| Distal M1                                         | 14/36 (39)      | 13/46 (28)       |      |
| M2                                                | 1/36 (3)        | 3/46 (7)         |      |
| Hyperdense artery sign, n/N (%)                   | 21/32 (66)      | 27/46 (59)       | 0.54 |
| Median TAI in Hounsfield units (IQR) <sup>g</sup> | 4.9 (-0.8-11.2) | 3.7 (-2.6-33.1)  | 1.00 |
| Clot length (mm) (IQR) <sup>h</sup>               | 10.9 (9.8-23.1) | 26.4 (19.2-33.3) | 0.03 |

---

ASPECTS indicates Alberta Stroke Program Early CT Score; DOAC, direct oral anticoagulant; EVT, endovascular treatment; INR, international normalized ratio; ICA(-T), internal carotid artery(-terminal); IQR, interquartile range; IV rtPA indicates intravenous recombinant tissue plasminogen activator; M1, first segment of middle cerebral artery; M2, second segment of middle cerebral artery; mRS, modified Rankin Scale score; NASCET, North American Symptomatic Carotid Endarterectomy Trial; NIHSS, National Institutes of Health Stroke Scale; TAI, thrombus attenuation increase ( $\Delta$ ). <sup>a</sup>Of 190 patients with cervical carotid atherosclerosis, 36 had a stenosis degree of 51-70%, 46 of 71-99% and 108 had an occlusion of the extracranial internal carotid artery. Missing: <sup>b</sup>2; <sup>c</sup>11; <sup>d</sup>10; <sup>e</sup>13; <sup>f</sup>3; <sup>g</sup>65; <sup>h</sup>65.

**Supplemental Table III.** Clinical outcomes of large vessel occlusion stroke patients with moderate (51-70%) and severe (71-99%) stenosis of the ipsilateral cervical carotid artery measured according to NASCET method

|                                          | Cervical carotid stenosis (N = 82) |                             |                    |                               |
|------------------------------------------|------------------------------------|-----------------------------|--------------------|-------------------------------|
|                                          | 51-70% stenosis<br>(n = 36)        | 71-99% stenosis<br>(n = 46) | Common OR (95% CI) | Adjusted (common) OR (95% CI) |
| Median mRS at 90 days (IQR) <sup>a</sup> | 3 (1-6)                            | 2 (1-3)                     | 1.91 (0.82 – 4.46) | 1.70 (0.70 – 4.15)            |
| mRS 0-2 at 90 days, n/N (%)              | 13/32 (41)                         | 28/45 (62)                  | 1.89 (0.71 – 5.01) | 1.66 (0.49 – 5.57)            |
| Mortality at 90 days, n/N (%)            | 9/32 (28)                          | 5/45 (11)                   | 0.42 (0.13 – 1.35) | 0.26 (0.05 – 1.39)            |
| Symptomatic ICH, n/N (%)                 | 3/36 (8)                           | 0/46 (0)                    | n/a                | n/a                           |

ICH indicates symptomatic intracranial hemorrhage; IQR, interquartile range; OR, odds ratio; mRS, modified Rankin Scale score; NASCET, North American Symptomatic Carotid Endarterectomy Trial. <sup>a</sup>Missing: 5.

**Supplemental Table IV.** Baseline characteristics of patients with large vessel occlusion stroke with incomplete recanalization (eTICI 0-2A)

|                                                            | eTICI 0-2A (N = 299)                      |                          | P-value |
|------------------------------------------------------------|-------------------------------------------|--------------------------|---------|
|                                                            | Cervical carotid atherosclerosis (n = 90) | Cardioembolism (n = 209) |         |
| Median age, years (IQR)                                    | 71 (64-79)                                | 76 (67-84)               | <0.01   |
| Men, n (%)                                                 | 58 (64)                                   | 96 (46)                  | <0.01   |
| Medical history                                            |                                           |                          |         |
| Diabetes mellitus, n/N (%)                                 | 12/88 (14)                                | 35/208 (17)              | 0.49    |
| Hypertension, n/N (%)                                      | 41/88 (47)                                | 130/208 (63)             | 0.01    |
| Ischemic stroke, n/N (%)                                   | 12/88 (14)                                | 47/209 (23)              | 0.08    |
| Medication                                                 |                                           |                          |         |
| DOAC, n/N (%)                                              | 0/87                                      | 18/205 (9)               | <0.01   |
| Vitamin K antagonist, n/N (%)                              | 2 (2)                                     | 71/207 (34)              | <0.001  |
| Antiplatelets, n/N (%)                                     | 28 (31)                                   | 59/205 (29)              | 0.69    |
| IV rtPA prior to EVT, n (%)                                | 78 (87)                                   | 124/209 (59)             | <0.001  |
| Pre-stroke mRS, n/N (%)                                    |                                           |                          |         |
| 0                                                          | 71/88 (81)                                | 121/207 (59)             |         |
| 1                                                          | 8/88 (9)                                  | 39/207 (19)              |         |
| 2                                                          | 5/88 (6)                                  | 17/207 (8)               |         |
| ≥3                                                         | 4/88 (5)                                  | 30/207 (15)              |         |
| Clinical characteristics                                   |                                           |                          |         |
| Median NIHSS (IQR) <sup>a</sup>                            | 16 (13-19)                                | 16 (12-20)               | 0.76    |
| Median systolic blood pressure in mmHg (IQR) <sup>b</sup>  | 160 (145-175)                             | 152 (133-170)            | 0.01    |
| Median diastolic blood pressure in mmHg (IQR) <sup>c</sup> | 84 (71-94)                                | 84 (71-95)               | 0.86    |
| Median onset-to-groin in minutes (IQR)                     | 213 (150-284)                             | 225 (169-300)            | 0.43    |
| Laboratory investigations                                  |                                           |                          |         |
| Median serum glucose (IQR) <sup>d</sup>                    | 6.5 (5.8-8.1)                             | 6.9 (6.08.2)             | 0.20    |

|                                                   |                  |                  |        |
|---------------------------------------------------|------------------|------------------|--------|
| Median platelet count (IQR) <sup>e</sup>          | 231 (204-276 )   | 222 (185-277)    | 0.41   |
| Median INR (IQR) <sup>f</sup>                     | 1.0 (1.0-1.0)    | 1.1 (1.0-1.6)    | <0.001 |
| Imaging characteristics                           |                  |                  |        |
| Median ASPECTS (IQR) <sup>g</sup>                 | 9 (7-10)         | 9 (7-10)         | 0.69   |
| Occlusion location on CT-angiography, n/N (%)     |                  |                  | <0.001 |
| ICA                                               | 16/90 (18)       | 4/194 (2)        |        |
| ICA-T                                             | 34/90 (38)       | 38/194 (20)      |        |
| Proximal M1                                       | 20/90 (22)       | 45/194 (23)      |        |
| Distal M1                                         | 16/90 (18)       | 68/194 (35)      |        |
| M2                                                | 4/90 (4)         | 36/194 (19)      |        |
| Hyperdense artery sign, n/N (%)                   | 60/87 (69)       | 104/193 (54)     | 0.02   |
| Median TAI in Hounsfield units (IQR) <sup>h</sup> | 8.5 (1.6-17.6)   | 2.2 (-1.7-8.0)   | 0.04   |
| Clot length (mm) (IQR) <sup>i</sup>               | 21.5 (18.7-29.8) | 13.3 (10.2-16.9) | <0.001 |

---

ASPECTS indicates Alberta Stroke Program Early CT Score; DOAC, direct oral anticoagulant; eTICI, extended Treatment in Cerebral Ischemia scale; EVT, endovascular treatment; INR, international normalized ratio; ICA(-T), internal carotid artery(-terminal); IQR, interquartile range; IV rtPA indicates intravenous recombinant tissue plasminogen activator; M1, first segment of middle cerebral artery; M2, second segment of middle cerebral artery; mRS, modified Rankin Scale score; National Institutes of Health Stroke Scale; TAI, thrombus attenuation increase ( $\Delta$ ).  
Missing: <sup>a</sup>6; <sup>b</sup>3; <sup>c</sup>6; <sup>d</sup>40; <sup>e</sup>38; <sup>f</sup>45; <sup>g</sup>16, <sup>h</sup>224, <sup>i</sup>224.

**Supplemental Table V.** Clinical outcomes of patients with large vessel occlusion stroke with incomplete recanalization (eTICI 0-2A)

|                                          | eTICI 0-2A (N = 299)                      |                          |                                        |
|------------------------------------------|-------------------------------------------|--------------------------|----------------------------------------|
|                                          | Cervical carotid atherosclerosis (n = 90) | Cardioembolism (n = 209) | Adjusted (common) OR/ $\beta$ (95% CI) |
| Median mRS at 90 days (IQR) <sup>a</sup> | 4 (2-6)                                   | 5 (3-6)                  | 2.12 (1.17 – 3.83)                     |
| mRS 0-2 at 90 days, n/N (%)              | 26/84 (31)                                | 45/197 (23)              | 1.86 (0.92 – 3.74)                     |
| Mortality, n/N (%)                       | 23/84 (27)                                | 83/197 (42)              | 0.52 (0.25 – 1.06)                     |
| Symptomatic ICH, n/N (%)                 | 6/90 (7)                                  | 13/209 (6)               | 0.94 (0.34 – 2.62)                     |

ICH indicates symptomatic intracranial hemorrhage; IQR interquartile range; OR, odds ratio; mRS, modified Rankin Scale score.

<sup>a</sup>Missing: 18.

## Supplemental Figures

**Supplemental Figure I.** Collateral circulation for patients with large vessel occlusion stroke with moderate and severe stenosis of the ipsilateral cervical carotid artery.

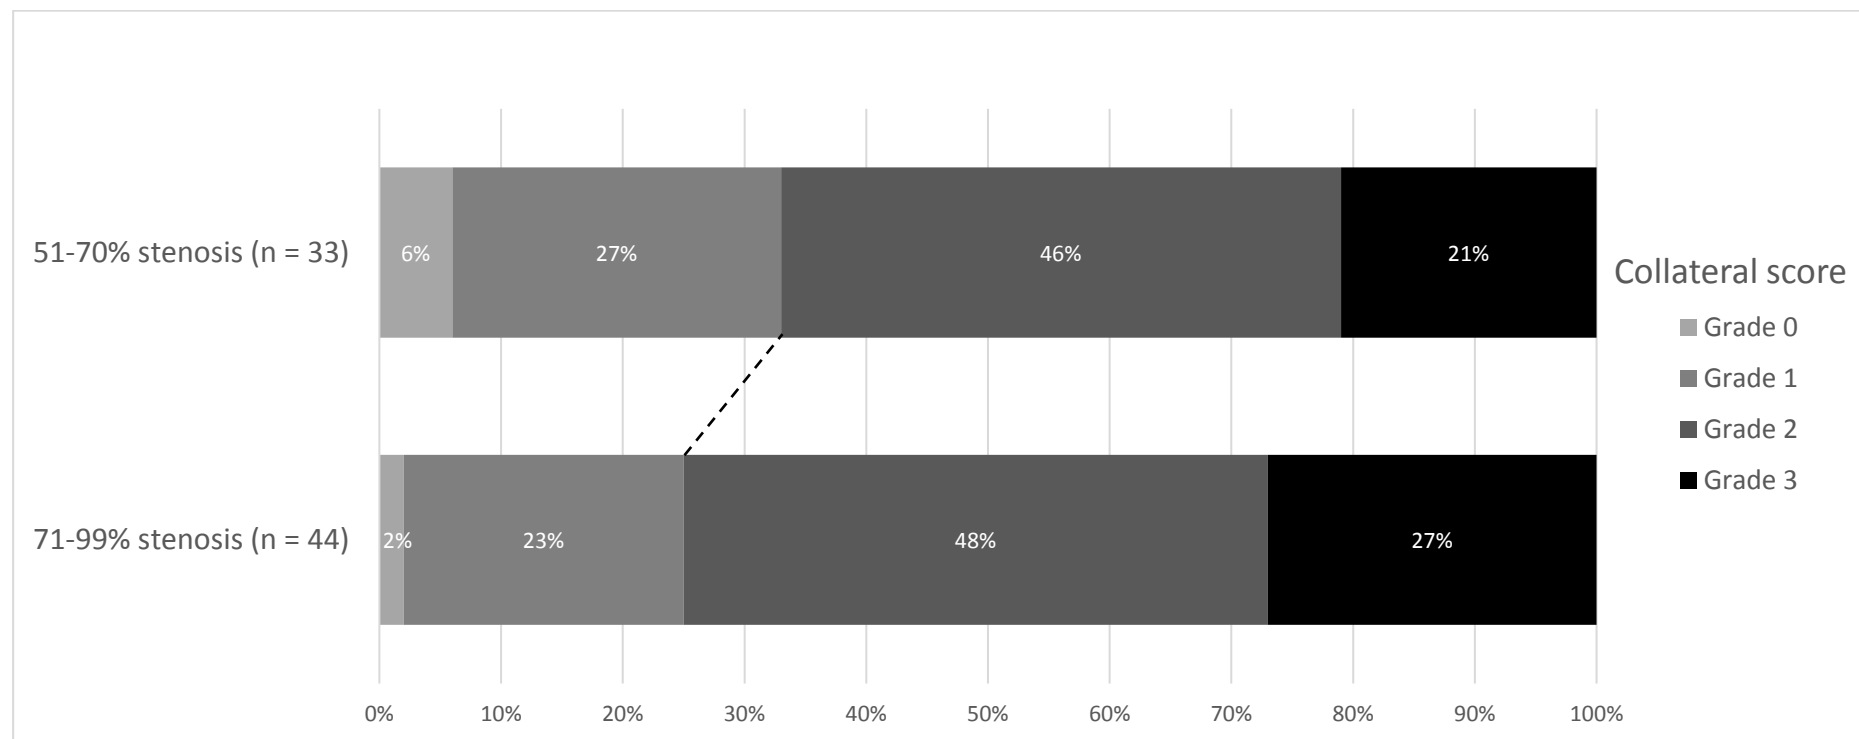

Collateral score was graded by the imaging core laboratory on a 4-point scale, with 0 for absent collaterals (0% filling of the occluded vascular territory), 1 for poor (>0% and  $\leq$ 50% filling), 2 for moderate (>50% and <100% filling), and 3 for good collaterals (100% filling).

A slightly larger proportion of patients with 71-99% stenosis had a good (grade 2-3-) collateral status compared to those with 51-70% stenosis (33/44 (75%) vs 22/33 (67%),  $p=0.423$ ), although this difference was not present after adjustment for confounders (adjusted OR 1.06; 95% CI 0.39 – 2.90). Also in ordinal regression analyses patients with 71-99% stenosis tended to have a shift towards better collateral scores than patients with 51-70% stenosis, although this failed to reach statistical significance (median 2 vs 2, adjusted cOR 1.14, 95% CI 0.47 – 2.60).
